# Supplementary material for: Physical Localization of the Root-Knot Nematode (Meloidogyne incognita) Resistance Locus Me7 in Pepper (Capsicum annuum)
Source: Front Plant Sci. 2019 Jul 9;10:886. doi: 10.3389/fpls.2019.00886 (PMC6629957; doi:10.3389/fpls.2019.00886)
Supplement: TABLE S1 — Me loci and N linked markers from previous studies. [file Table_1.XLSX]

## Sheet: Sheet1
Supplementary Table S1. Me loci and N linked markers from previous studies.
Name of marker	Primer sequence	Linkage with locus	Reference	No. of recombinants in 192/714 F2 individuals
SCAR_PM6a	F: ttcttacccctgtacatcacatcct	Me3, Me7, N	Fazari et al. (2012)	0/0
	R: aacctggaaatttctggaggtatg
SCAR_PM6b	F: cccggtctattttccctttt	Me3, Me7, N	Fazari et al. (2012)	0/0
	R: tgtctaaattctcatggcagtg
CASSR37	F: acatacccaaaaactctctcac	N	Celik et al., 2016	3/-
	R: gattgaccatgtttccgtat
PE43N9R	F: agatttggctcacctgacc	Me3	Guo et al., 2016	not polymorphic
	R: gatggcataagagggctttaga
PE242G21R	F: ggttgttaatattatactatc	Me3	Guo et al., 2016	not polymorphic
	R: acaacaacacacggttacaag
PE11F6F	F: tgactcgcgcaaatacaag	Me3	Guo et al., 2016	not polymorphic
	R: gaagatttccttaagtccggc
PE25F15F	F: tccctccttgctgtcatcac	Me3	Guo et al., 2016	not polymorphic
	R: tgttgtctgcacatgccttg
