# Supplementary material for: Physical Localization of the Root-Knot Nematode (Meloidogyne incognita) Resistance Locus Me7 in Pepper (Capsicum annuum)
Source: Front Plant Sci. 2019 Jul 9;10:886. doi: 10.3389/fpls.2019.00886 (PMC6629957; doi:10.3389/fpls.2019.00886)
Supplement: TABLE S2 — Newly developed markers used in the Me7 locus mapping. [file Table_2.XLSX]

## Sheet: Sheet1
Supplementary Table S2. Newly developed markers used in the Me7 locus mapping.
Name of marker	Primer sequence	Marker type	Sequence origin	No. of recombinants in 192 F2 individuals	No. of recombinants in 714 F2 individuals
Y35b	F: ggtggggtcctcgatgaca	HRM	v.1.55 chr P9	29	-
	R: cgcctgcactatctccccta
Y58b	F: ggcacctttaacgtagatccca	HRM	v.1.55 chr P9	28	-
	R: acccttcatctgccatccca
9217078971	F: cttgagaagagtgtctatcg	HRM	v.1.55 chr P9	6	-
	R: tggtggagaatagagatcag
Me7B1a	F: cgtttaacttggcttcgtcg	HRM	v.1.55 chr P9	6	-
	R: ctacgtggccatctcacgtc
NBLRR7b1	F: ggtcgaaaaagctttcccat	HRM	v.1.55 chr P9	3	5
	R: cggcaactctatccaccaaa
Me7748b	F: cctttgcattgtactgcatctc	HRM	v.1.55 chr P9	3	5
	R: gggtcgatttctacagaccgt
NBLRR6b	F: tggtgatgacctcggaaaga	HRM	v.1.55 chr P9	3	5
	R: cattagctggttattgatgggc
CA63a	F: ctagagcagtggagttcacc	HRM	v.1.5 scaffold 1578	2	3
	R: gtgtcaaagagacttagtctcct
6119403	F: accaaggacaatgtacactt	HRM	BAC611K18	1	2
	R: agtaaccactatgtcagttgg
G21U3	F: acaaatgacaactttcctgc	HRM	BAC611K18	0	1
	R: acatggacaggagatacgaa
G24U5	F: acaaccaagaacatatggct	HRM	BAC611K18	0	0
	R: agttcattgtttccgatgttg
CA1-1b	F: gacgaaatttgcgctattca	HRM	BAC611K18	0	0
	R: gatccatgaagtccatctgc
611109646	F: agaagcattgggtggaac	HRM	BAC611K18	0	0
	R: tcaacctgcttctccttaac
SF164076	F: gggaggattgcccaagacaa	HRM	v.1.5 scaffold 1640	0	0
	R: gggatgattagtagtatccagtggc
SF16406	F: cagtggctgatcgagagcac	HRM	v.1.5 scaffold 1640	0	0
	R: cagacatcagaggcatgcca
SF164024	F: gcagcatcagcatccgaatctt	HRM	v.1.5 scaffold 1640	0	0
	R: tcccttattatgagtcgttgcct
2111b1	F: tctgggccaaaaatgctacca	HRM	v.1.5 scaffold 1578	0	0
	R: tggtttgactaacactcctgca
G43U3	F: aagacgatcctgttagagtg	HRM	v.1.5 scaffold 1578	1	1
	R: tgggacttttacccactct
G79U3	F: tgatgtcaagtttagggtca	HRM	v.1.5 scaffold 1677	1	1
	R: ttgaggagttcaaggaatga
G80U5	F: taggtgaaatggtgtgaacg	HRM	v.1.5 scaffold 1677	2	2
	R: acagtgggctataacacatag
G81U3	F: tcattctcaccttcgcatag	HRM	v.1.55 chr P9	3	3
	R: tcaatatctgcaacctcagt
NBLRR10b	F: tggtggagcatgaaaaggga	HRM	v.1.55 chr P9	3	-
	R: agactgaatcgaaggatggttg
551458	F: acgagagtgaatgaagttgctcc	HRM	v.1.55 chr P9	4	-
	R: ggtggtggtggtgttcgata
551511	F: gcggttaatatgtcaccgaat	HRM	v.1.55 chr P9	4	-
	R: aagccggacacaccgataat
NBLRR12	F: cggagaccatgattggtttg	HRM	v.1.55 chr P9	10	-
	R: gcatgttccatccacgaaag
551177	F: gcttggcggacaactccttt	HRM	v.1.55 chr P9	10	-
	R: tgtagcttatgcgtgttggct
18660	F: ttggtgtcgagtctggtgta	CAPS	v.1.55 chr P9	13	-
	R: atgccttcgatcttctcagtg	(MspI)
SF164664	F: acgtgtgttagtatcccgagact	HRM	v.1.5 scaffold 1646	6/10*	-
	R: tgtgaaactgtaagcttctgca
* 6 recombinants were detected out of 10 selected recombinant individuals from 192 F2 population.
